# Supplementary material for: Severe falciparum malaria in pregnancy in Southeast Asia: a multi-centre retrospective cohort study
Source: Springer Nature journal article supplement (doi:10.1186/s12916-023-02991-8), 2023-08-24
Supplement: MOESM1 [file 25959358]

**Table S1. The World Health Organization Severe Malaria Criteria (from current Guidelines for the treatment of malaria) [6]**

For epidemiological purposes, severe falciparum malaria is defined as one or more of the following, occurring in the absence of an identified alternative cause and in the presence of *P. falciparum* asexual parasitaemia.

| Criterion               | WHO definition [6]                                                                                                                                                                                                                   | SMRU definition                                           | SEAQUAMAT [4]                                                          | AQ [20]                                                                | AAV [21]                                                                                 |
|-------------------------|--------------------------------------------------------------------------------------------------------------------------------------------------------------------------------------------------------------------------------------|-----------------------------------------------------------|------------------------------------------------------------------------|------------------------------------------------------------------------|------------------------------------------------------------------------------------------|
| Impaired consciousness  | A Glasgow coma score < 11 in adults or a Blantyre coma score < 3 in children                                                                                                                                                         | Coma or Glasgow coma score < 11 if assessed.              | Same as WHO                                                            | Glasgow Coma Scale of less than 11                                     | Glasgow Coma Scale of less than 11                                                       |
| Prostration†            | Generalized weakness so that the person is unable to sit, stand or walk without assistance                                                                                                                                           | Same as WHO                                               | Not used as an enrolment criterion                                     | Not used as an enrolment criterion                                     | Not used as an enrolment criterion                                                       |
| Multiple convulsions†   | More than two episodes within 24 h                                                                                                                                                                                                   | Same as WHO                                               | Not used as an enrolment criterion                                     | Not used as an enrolment criterion                                     | Not used as an enrolment criterion                                                       |
| Acidosis                | A base deficit of > 8 mEq/L or, if not available, a plasma bicarbonate level of < 15 mmol/L or venous plasma lactate $\geq$ 5 mmol/L. Severe acidosis manifests clinically as respiratory distress (rapid, deep, laboured breathing) | Not available                                             | Same as WHO (Blood bicarbonate <15 mmol/L)                             |                                                                        | Plasma lactate > 4 mmol/L or standard base excess > - 5 mmol/L, base deficit < 10 mmol/L |
| Hypoglycaemia           | Blood or plasma glucose < 2.2 mmol/L (< 40 mg/dL)                                                                                                                                                                                    | Same as WHO                                               | Same as WHO                                                            | Same as WHO                                                            | Same as WHO                                                                              |
| Severe malarial anaemia | Haemoglobin concentration $\leq$ 5 g/dL or a haematocrit of $\leq$ 15% in children < 12 years of age (<                                                                                                                              | Same as WHO (Haemoglobin concentration $\leq$ 7 g/dL or a | Haematocrit < 20% with a parasite count of more than 100,000/ $\mu$ L* | Haematocrit < 20% with a parasite count of more than 100,000/ $\mu$ L* | Haematocrit < 20% with a parasite count of more than 100,000/ $\mu$ L*                   |

|                      |                                                                                                                                                               |                                                                                                                            |                                                                                     |                                                                                         |                                                          |
|----------------------|---------------------------------------------------------------------------------------------------------------------------------------------------------------|----------------------------------------------------------------------------------------------------------------------------|-------------------------------------------------------------------------------------|-----------------------------------------------------------------------------------------|----------------------------------------------------------|
|                      | 7 g/dL and < 20%, respectively, in adults) with a parasite count > 10 000/μL                                                                                  | haematocrit of ≤ 20% with a parasite count > 10 000/μL)                                                                    |                                                                                     |                                                                                         |                                                          |
| Renal impairment     | Plasma or serum creatinine > 265 μmol/L (3 mg/dL) or blood urea > 20 mmol/L                                                                                   | Anuria                                                                                                                     | Blood urea nitrogen >17 mmol/L                                                      | Urine output <400 mL per 24 hours; and serum creatinine, >3 mg/dL (250 μmol/L)          | Oliguria and serum creatinine > 250 μmol/L               |
| Jaundice             | Plasma or serum bilirubin > 50 μmol/L (3 mg/dL) with a parasite count > 100 000/ μL                                                                           | Jaudice by clinical assessment with a parasite count > 100 000/ μL                                                         | Visible jaundice and P falciparum parasitaemia >100 000/μL                          | Serum bilirubin, > 2.5 mg/dL (50 μmol/L), with a parasite count of more than 100,000/μL | Same as WHO                                              |
| Pulmonary oedema     | Radiologically confirmed or oxygen saturation < 92% on room air with a respiratory rate > 30/min, often with chest indrawing and crepitations on auscultation | Respiratory failure requiring supplemental Oxygen; or oxygen saturation < 92% on room air with a respiratory rate > 30/min | Respiratory distress (>32 breaths per min)                                          | Not used as an enrolment criterion                                                      | Not used as an enrolment criterion                       |
| Significant bleeding | Including recurrent or prolonged bleeding from the nose, gums or venepuncture sites; haematemesis or melaena                                                  | Not systematically assessed                                                                                                | Not used as an enrolment criterion                                                  | Not used as an enrolment criterion                                                      | Not used as an enrolment criterion                       |
| Shock                | Compensated shock is defined as capillary refill ≥ 3 s or temperature gradient on leg (mid to proximal limb), but no                                          | Systolic blood pressure < 80 mm Hg                                                                                         | Shock, as assessed by admitting physician (low blood pressure and cool peripheries) | Systolic blood pressure < 80 mm Hg with cool extremities                                | Systolic blood pressure < 80 mm Hg with cool extremities |

|                   |                                                                                                                                                                                                             |             |             |             |                                    |
|-------------------|-------------------------------------------------------------------------------------------------------------------------------------------------------------------------------------------------------------|-------------|-------------|-------------|------------------------------------|
|                   | hypotension. Decompensated shock is defined as systolic blood pressure < 70 mm Hg in children or < 80 mm Hg in adults, with evidence of impaired perfusion (cool peripheries or prolonged capillary refill) |             |             |             |                                    |
| Hyperparasitaemia | <i>P. falciparum</i> parasitaemia > 10%                                                                                                                                                                     | Same as WHO | Same as WHO | Same as WHO | Parasite count > 500,000/ $\mu$ L* |

\*In the current study, the same criterion as the WHO definition was used.

†Prostration and repeated convulsions are not included in the “research definition” of severe malaria in the WHO severe malaria supplement [2].
