# Supplementary material for: Severe falciparum malaria in pregnancy in Southeast Asia: a multi-centre retrospective cohort study
Source: Springer Nature journal article supplement (doi:10.1186/s12916-023-02991-8), 2023-08-24
Supplement: MOESM2 [file 25959358]

**Table S2. Treatment for each severe falciparum malaria sub-group group over time at the Shoklo Malaria Research Unit**

| Start year                                                                                                       | Treatment for pregnant women                                                                                                                                                       |                                                                                                               |
|------------------------------------------------------------------------------------------------------------------|------------------------------------------------------------------------------------------------------------------------------------------------------------------------------------|---------------------------------------------------------------------------------------------------------------|
| <b>First-line initial treatment for severe malaria with organ dysfunction</b>                                    |                                                                                                                                                                                    |                                                                                                               |
| 1989                                                                                                             | Q IV: 20mg/kg (H0) over 4 hours followed by 10mg/kg over 2 hours every 8 hours                                                                                                     |                                                                                                               |
| 1996                                                                                                             | Q IV: 20mg/kg (H0) over 4 hours followed by 10mg/kg over 2 hours every 8 hours<br>Or<br>AM IM: 3.2 mg/kg (H0) followed by 1.6 mg/kg every 24 hours (or 8-12 hourly in 1996–7)      |                                                                                                               |
| 2000                                                                                                             | AS IV + (from 2006) clindamycin p.o.<br>H0: 2.4 mg, H12 and H24 1.2mg/kg and then 1.2 mg/kg every 24 hours<br>Or AM IM or Q IV if AS IV is unavailable                             |                                                                                                               |
| 2013                                                                                                             | AS IV + clindamycin p.o.<br>2.4mg/kg at H0, H12, H24 and then every 24 hours<br>Suspected AS resistance or severe malaria with hyperparasitaemia ( $\geq 4\%$ RBC)<br>Q IV + AS IV |                                                                                                               |
| <b>First-line for severe malaria with hyperparasitaemia (&gt;10% RBC) only (without other organ dysfunction)</b> |                                                                                                                                                                                    |                                                                                                               |
| 1986                                                                                                             | Q IV: 20mg/kg (H0) over 4 hours followed by 10mg/kg over 2 hours every 8 hours                                                                                                     |                                                                                                               |
| 1994                                                                                                             | AS p.o. 4mg/kg (D0), 2mg/kg (D1–2) and 1mg/kg (D3–6) (total dose 12 mg/kg)†                                                                                                        |                                                                                                               |
| 1997                                                                                                             | AS p.o. 4mg/kg (D0), 2mg/kg (D1–4) and 1mg/kg (D5–6) (total dose 16mg/kg) †                                                                                                        |                                                                                                               |
| 1999                                                                                                             | AS p.o. 4mg/kg (D0), 2mg/kg (D1–6) (total dose 16mg/kg) †                                                                                                                          |                                                                                                               |
| 2012                                                                                                             | AS p.o. 4mg/kg (D0), 2mg/kg (D1–6) with DP p.o. 3 days (D4–6)*                                                                                                                     |                                                                                                               |
| 2013                                                                                                             | AS p.o. 4 mg/kg (D0–2) followed by DP p.o. 5 days (D2–6)*                                                                                                                          |                                                                                                               |
| 2016                                                                                                             | Any ACT extended regimen (for 7 days)*                                                                                                                                             |                                                                                                               |
| <b>First-line for severe malaria with severe anaemia only (without other organ dysfunction)</b>                  |                                                                                                                                                                                    |                                                                                                               |
| 1989                                                                                                             | All trimesters                                                                                                                                                                     | Q7 or or MFQ p.o. (25mg/kg single dose)                                                                       |
| 1994                                                                                                             | 1st trimester                                                                                                                                                                      | Q7                                                                                                            |
|                                                                                                                  | 2nd & 3rd trimester                                                                                                                                                                | 1st episode: Q7 or MFQ p.o. (25mg/kg single dose)<br>$\geq 2$ nd episode: AS p.o. (2mg/kg D0–D4, 1mg/kg D5–6) |
| 1996                                                                                                             | 1st trimester                                                                                                                                                                      | Q7                                                                                                            |
|                                                                                                                  | 2nd & 3rd trimester                                                                                                                                                                | AS p.o. (2mg/kg D0–D4, 1mg/kg D5–6) or MAS                                                                    |
| 2006                                                                                                             | 1st trimester                                                                                                                                                                      | Q p.o. + clindamycin for 7 days                                                                               |
|                                                                                                                  | 2nd & 3rd trimester                                                                                                                                                                | AS p.o. + clindamycin for 7 days                                                                              |
| 2017                                                                                                             | All trimesters                                                                                                                                                                     | Available ACT                                                                                                 |

AS: artesunate. AC: artesunate+clindamycin. D: day. DP: dihydroartemisinin+piperazine. H: hour. IM: intramuscular. IV: intravenous. MAS:mefloquine+artesunate. MFQ: mefloquine. p.o.: per os. Q: quinine. RBC: red blood cells.

Clindamycin was given orally 5mg/kg three times a day for 7 days.

MAS: mefloquine 25 mg/kg in total + artesunate 4mg/kg for three days

Q7: Q p.o.: 10mg/kg three times a day for 7 days.

A rescue dose (1.2 mg/kg) was given if parasitaemia increased above the 95<sup>th</sup> percentile of the usual parasite clearance curve [19].

‡ Treatment was switched to oral drug once tolerated. Total 12–16 mg/kg (-2012) or 16–18 mg/kg (2013-) of AS or AM was given over 7 days.

† A partner drug (e.g. MFQ, or atovaquone-proguanil if available) was used whenever possible.

\*First dose was given by IV or IM (2.4mg/kg) to those with asexual parasitaemia of >20% RBC.
