# Supplementary material for: Severe falciparum malaria in pregnancy in Southeast Asia: a multi-centre retrospective cohort study
Source: Springer Nature journal article supplement (doi:10.1186/s12916-023-02991-8), 2023-08-24
Supplement: MOESM4 [file 25959358]

**Table S3. The numbers and proportion of pregnant women who met each severe malaria criterion**

| WHO severe malaria criterion | SMRU cohort (n=123) | Hospital based cohorts (n=90) |
|------------------------------|---------------------|-------------------------------|
| Coma                         | 19% (23/121)        | 52% (47/90)                   |
| Severe anaemia               | 43% (48/112)        | 24% (21/89)                   |
| Severe anaemia only          | 31% (35/112)        | 3% (3/89)                     |
| Renal failure                | 6% (6/100)          | 13% (11/88)                   |
| Respiratory failure          | 6% (7/109)          | 16% (13/82)                   |
| Convulsion                   | 2% (2/109)          | 6% (5/90)                     |
| Severe metabolic acidosis    | Not assessed        | 39% (35/90)                   |
| Jaundice                     | 6% (7/112)          | 26% (23/90)                   |
| Hypoglycaemia                | 10% (6/61)          | 7% (6/88)                     |
| Hypotension                  | 2% (2/110)          | 5% (4/88)                     |
| Hyperparasitaemia            | 53% (61/116)        | 26% (25/90)                   |
| Hyperparasitaemia only       | 41% (47/116)        | 1% (1/90)                     |
| Prostration                  | 11% (12/110)        | 100% (6/6)                    |
| Severe bleeding              | Not assessed        | Not assessed                  |

MORU: Mahidol-Oxford Research Unit, SMRU: Shoklo Malaria Research Unit, WHO: World Health Organization.

The denominator is the number of patients assessed or information available.

The numbers and proportions of missing information are as following: coma (2, 1%); severe anaemia (12, 6%); renal failure (25, 12%); respiratory failure (22, 10%); convulsion (14, 7%); metabolic acidosis (123, 58%); jaundice (11, 5%); hypoglycemia (64, 30%); hypotension (15, 7%); hyperparasitaemia (7, 3%); prostration (97, 46%).
