# Supplementary material for: Severe falciparum malaria in pregnancy in Southeast Asia: a multi-centre retrospective cohort study
Source: Springer Nature journal article supplement (doi:10.1186/s12916-023-02991-8), 2023-08-24
Supplement: MOESM6 [file 25959358]

**Table S4. The adjusted odds ratio of maternal death by complete case analysis model and multiple imputation model**

|                     | Univariable        | Multivariable      |                     |
|---------------------|--------------------|--------------------|---------------------|
|                     |                    | MI (n=213)         | CC (n=187)          |
| Coma                | 11.40 (3.56-36.50) | 7.17 (2.01-25.57)  | 3.77 (0.96-14.82)   |
| Respiratory failure | 12.95 (3.16-53.12) | 4.98 (1.13-22.01)  | 7.10 (1.49-33.74)   |
| Hypotension         | 10.83 (1.84-63.89) | 11.21 (1.27-98.92) | 27.56 (2.46-308.33) |

CC: complete case, MI: multiple imputation
