# Supplementary material for: Severe falciparum malaria in pregnancy in Southeast Asia: a multi-centre retrospective cohort study
Source: Springer Nature journal article supplement (doi:10.1186/s12916-023-02991-8), 2023-08-24
Supplement: MOESM7 [file 25959358]

**Table S5. Univariable and multivariable penalised logistic regression on the potential prognostic factors for maternal death using the WHO severe malaria criteria for research purposes**

| Characteristic          | N      | Univariable         |         | Multivariable       |         |
|-------------------------|--------|---------------------|---------|---------------------|---------|
|                         |        | Odds ratio (95% CI) | p-value | Odds ratio (95% CI) | p-value |
| Age <20 years           | 6/39   | 3.97 (1.00-15.77)   | 0.05    |                     |         |
| 20-29                   | 3/82   | Reference           |         |                     |         |
| ≥30                     | 7/53   | 3.23 (0.86-12.12)   | 0.08    |                     |         |
| Trimester First         | 2/21   | 0.93 (0.18-4.70)    | 0.93    |                     |         |
| Second                  | 7/69   | Reference           |         |                     |         |
| Third                   | 8/70   | 1.23 (0.41-3.66)    | 0.71    |                     |         |
| Postpartum              | 1/3    | 6.90 (0.75-63.40)   | 0.09    |                     |         |
| Gravidity primigravida  | 4/43   | Reference           |         |                     |         |
| Multigravida            | 6/75   | 0.82 (0.23-2.91)    | 0.76    |                     |         |
| Presence of gametocytes | 4/38   | 3.63 (0.69-19.01)   | 0.13    |                     |         |
| No                      | 2/86   | Reference           |         |                     |         |
| Presence of schizont    | 1/16   | 1.97 (0.29-13.49)   | 0.49    |                     |         |
| No                      | 4/95   | Reference           |         |                     |         |
| Presence of pigment†    | 7/97   | 2.60 (0.13-52.46)   | 0.53    |                     |         |
| No                      | 0/29   | Reference           |         |                     |         |
| Fever >37.5 C           | 9/93   | 0.98 (0.31-3.09)    | 0.98    |                     |         |
| No                      | 7/84   | Reference           |         |                     |         |
| Coma                    | 22/70  | 10.72 (3.34-34.44)  | 0.0001  | 6.86 (1.91-24.66)   | 0.003   |
| No                      | 4/136  | Reference           |         | Reference           |         |
| Severe anaemia          | 6/69   | 1.34 (0.43-4.18)    | 0.61    |                     |         |
| No                      | 14/126 | Reference           |         |                     |         |
| Renal failure           | 5/17   | 4.60 (1.15-18.39)   | 0.03    |                     |         |
| No                      | 13/167 | Reference           |         |                     |         |
| Respiratory failure     | 5/20   | 12.60 (3.06-51.85)  | 0.0004  | 5.01 (1.15-21.90)   | 0.03    |
| No                      | 16/167 | Reference           |         | Reference           |         |
| Convulsion              | 1/7    | 2.68 (0.38-19.12)   | 0.32    |                     |         |
| No                      | 21/188 | Reference           |         |                     |         |
| Metabolic acidosis*     | 7/35   | 1.90 (0.48-7.49)    | 0.36    |                     |         |
| No                      | 9/54   | Reference           |         |                     |         |
| Jaundice                | 5/30   | 1.28 (0.37-4.43)    | 0.70    |                     |         |
| No                      | 16/168 | Reference           |         |                     |         |

|                   |    |        |                    |       |                    |      |
|-------------------|----|--------|--------------------|-------|--------------------|------|
| Hypoglycaemia     |    | 3/12   | 3.53 (0.77-16.27)  | 0.11  |                    |      |
|                   | No | 17/132 | Reference          |       |                    |      |
| Hypotension       |    | 2/6    | 10.67 (1.82-62.72) | 0.009 | 11.44 (1.15-99.56) | 0.03 |
|                   | No | 18/187 | Reference          |       | Reference          |      |
| Hyperparasitaemia |    | 8/86   | 1.27 (0.44-3.70)   | 0.66  |                    |      |
|                   | No | 13/114 | Reference          |       |                    |      |
| Prostration       |    | 4/12   | 4.85 (0.65-36.22)  | 0.12  |                    |      |
|                   | No | 4/98   | Reference          |       |                    |      |

CI: confidence interval. EGA: estimated gestational age.

Penalized logistic regression with fixed-effects for each study site is used. Multiple imputation is used for multivariable models. Calendar year and treatment (quinine-based or artemisinin-based) are adjusted in multivariable models.

\* Variables not assessed for multivariable model because missing >50%.

† When only patients with information on malaria pigment quantitatively assessed, the odds ratio of maternal deaths for women with pigment in neutrophil (>5%) was 2.33 (3/22 vs 2/29, 95%CI 0.34-15.83, p=0.39).

### Sensitivity analyses excluding women with convulsions or prostration

WHO has two criteria for severe malaria. The one used in the manuscript is for epidemiology and clinical management, defined in the WHO (treatment) guidelines [6]. The other one was for research purposes, defined in 2014 [2]. The difference between them is that two criteria, multiple convulsions and prostration, are not included in the latter.

Using the WHO 2014 severe malaria criteria for research purposes [2], the overall maternal mortality was 12.6% (26/207). Six pregnant women were excluded because they had prostration only. There were no maternal deaths among the excluded six women. The results of this sensitivity analysis are similar to the main results (Table S5).
