# Supplementary material for: Severe falciparum malaria in pregnancy in Southeast Asia: a multi-centre retrospective cohort study
Source: Springer Nature journal article supplement (doi:10.1186/s12916-023-02991-8), 2023-08-24
Supplement: MOESM8 [file 25959358]

**Table S6. Birthweight assessment by clinical severity groups on the Thailand-Myanmar border including only newborns who were weighed within three days from birth**

|              | All (n=42)          | Severe malaria with vital organ dysfunction (n=9) | Severe malaria with hyperparasitaemia only (n=23) | Severe malaria with severe anaemia only (n=10) |
|--------------|---------------------|---------------------------------------------------|---------------------------------------------------|------------------------------------------------|
| Birthweight  | 2710 [2420-3000]    | 2300 [2000-2600]                                  | 2740 [2600-3050]                                  | 2900 [2340-3100]                               |
| SGA          | 43% (18/42)         | 67% (6/9)                                         | 39% (9/23)                                        | 30% (3/10)                                     |
| Z-score      | -1.2 [-1.8 - -0.69] | -1.4 [-2.4 - -1.2]                                | -1.1 [-1.6 - -0.69]                               | -0.88 [-1.8 - -0.59]                           |
| LBW (<2500g) | 26% (11/42)         | 56% (5/9)                                         | 9% (2/23)                                         | 40% (4/10)                                     |

Median [interquartile range] or percentage (number of outcome / number evaluated) are presented.

LBW: low birth weight. SGA: Small for gestational age, SMRU: Shoklo Malaria Research Unit. INTERBROWTH-21st international standard growth chart was used for SGA (defined as <10%) and Z-score of birthweight for gestational age. Only live born singletons without congenital abnormality were included.
